# Supplementary material for: StalGrowth—A Program to Estimate Speleothem Growth Rates and Seasonal Growth Variations
Source: MDPI journal article supplement (doi:10.3390/geosciences11050187), 2021-04-27
Supplement: s1 [file s1]

Archive with 1 entries (1 files):
- geosciences-1078456 supplementary.pdf
